# Supplementary material
Source: PubMed Central journal article supplement (PMC6325494)
Supplement: ajtr0010-4107-f7.pdf [file ajtr0010-4107-f7.pdf]

Obesity attenuates tooth movement by elevating leptin level

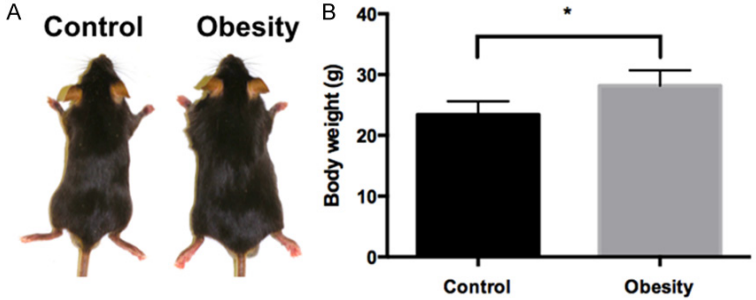

Figure S1. Obese mice model.

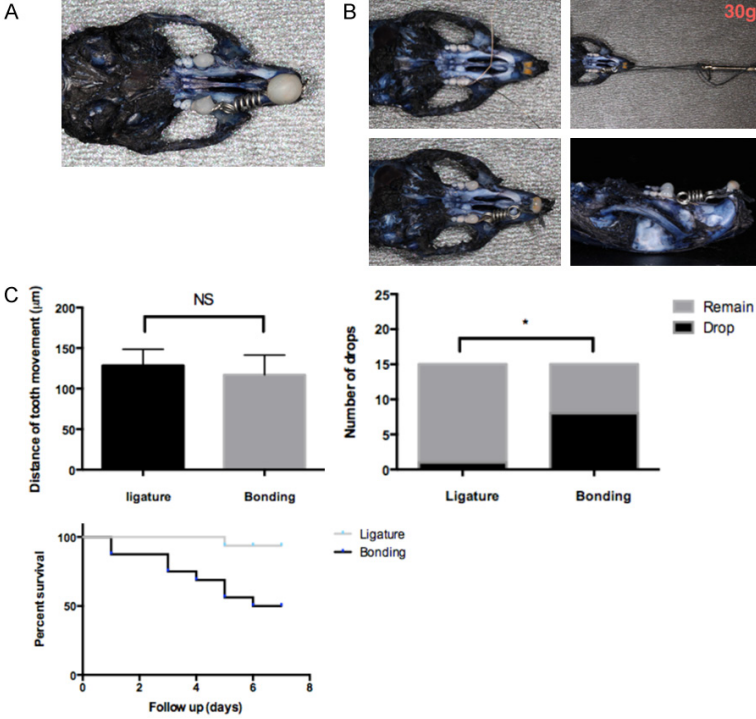

Figure S2. Orthodontic tooth movement model.

Obesity attenuates tooth movement by elevating leptin level

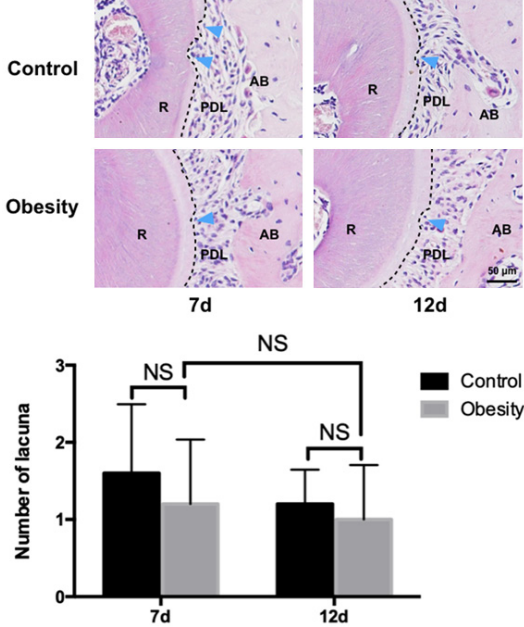

Figure S3. Root resorption in the control and obesity group after prolonged force application.
